# Supplementary material for: A physicochemical process for fabricating submicrometer hollow fluorescent spheres of Tb3+-incorporated calcium phosphate
Source: Royal Society of Chemistry journal article supplement (doi:10.1039/c5ra01155h), 2015-01-01
Supplement: c5ra01155h1.pdf [file c5ra01155h1.pdf]

## Electronic Supplementary Information

### A physicochemical process for fabricating submicrometer hollow fluorescent spheres of Tb<sup>3+</sup>-incorporated calcium phosphate

Maki Nakamura,<sup>\*a</sup> Ayako Oyane,<sup>a</sup> Ikuko Sakamaki,<sup>a</sup> Yoshiki Shimizu,<sup>a</sup> Kenji Koga,<sup>a</sup> and Naoto Koshizaki<sup>a,b</sup>

<sup>a</sup> Nanosystem Research Institute, National Institute of Advanced Industrial Science and Technology, 1-1-1 Higashi, Tsukuba, Ibaraki 305-8562, Japan. E-mail: ma-ki-nakamura@aist.go.jp

<sup>b</sup> Graduate School of Engineering, Hokkaido University, Kita 13, Nishi 8, Kita-ku, Sapporo, Hokkaido 060-8628, Japan.

#### Experimental

**Preparation of CaP-1.** Carbon nanopowders (0.3 g, Aldrich) and HAP nanopowders (1.5 g, Taihei Chemical Industrial Co., Ltd.) were mixed by mechanical milling in a planetary ball mill (Fritsch, type P-6) at 600 rpm (20 g) for 10 min. The obtained mixed powder was **CaP-1**.

**Preparation of CaP-2.** Powders of **CaP-1** (0.005 g) were dispersed into 4 mL of ethanol in a glass vessel. After ultrasonication, pulsed laser irradiation was immediately performed using the output of the third harmonic (355 nm) of a Nd:YAG laser (Quanta-Ray LAB-150-30, Spectra-Physics) operated at 30 Hz with a fluence of 200 mJ/pulse/cm<sup>2</sup> (an output power of 3 W), with stirring the dispersion. The laser beam possessed an output diameter of 8 mm and was irradiated without focusing. After irradiation for 20 min, the product was collected by centrifugation (6000 rpm (3700 g), 10 min), washed with ultrapure water, and dispersed in ultrapure water. The solution was centrifuged three times at 1000 rpm (103 g) for 10 min, and the collected supernatant was

centrifuged at 2000 rpm (410 g) for 10 min. The collected sediment was **CaP-2**.

**Preparation of CaP-3.** Carbon nanopowders (0.00083 g) and HAp nanopowders (0.00417 g) were dispersed into 4 mL of ethanol in a glass vessel. After ultrasonication, pulsed laser irradiation and centrifugation were performed in a similar manner to the procedure for **CaP-2**. The collected sediment was **CaP-3**.

**Preparation of CaP-4.** Powders of **CaP-1** (0.005 g) were dispersed into a 4-mL ethanol solution of terbium nitrate hexahydrate (5 mM) in a glass vessel. After ultrasonication, pulsed laser irradiation and centrifugation were immediately performed in a similar manner to the procedure for **CaP-2**. The collected sediment was **CaP-4**.

**Preparation of CaP-5.** Powders of **CaP-1** (0.005 g) were dispersed into a 4-mL ethanol solution of terbium nitrate hexahydrate (5 mM) in a glass vessel. After ultrasonication, the dispersion was stirred for 20 min without laser irradiation. The product was collected by centrifugation (6000 rpm (3700 g), 10 min), washed with ultrapure water, and collected again. The collected sediment was **CaP-5**.

**Characterization.** The obtained samples were mounted on a silicon substrate, and the morphology, chemical composition, and crystalline structure were examined by scanning electron microscopy (SEM; XL30, FEI), energy dispersive X-ray spectroscopy (EDX; Genesis2000, EDAX), X-ray diffractometry (XRD; M18X, MAC Science) with CuK $\alpha$  X-rays, and X-ray photoelectron spectroscopy (XPS; Axis Nova, Kratos). The micro and crystalline structure of the samples mounted on a thin carbon-coated copper grid were investigated by transmission electron microscopy and diffraction (TEM and TED; JEM-2010, JEOL). The fluorescence spectrum of **CaP-4** dispersed in distilled water was obtained by spectrofluorophotometer (RF-5300PC, Shimadzu).

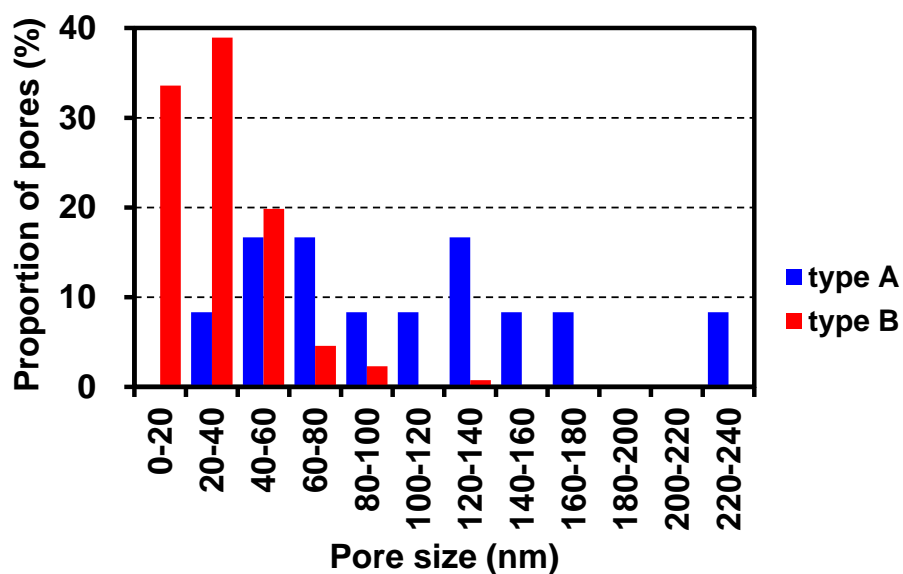

**Fig. S1** Pore size (hollow diameter) distribution of single-hollow spheres (type A) and multi-hollow spheres (type B). Pore sizes were measured on TEM images for total 12 single-hollow spheres (type A) and 38 multi-hollow spheres (type B).

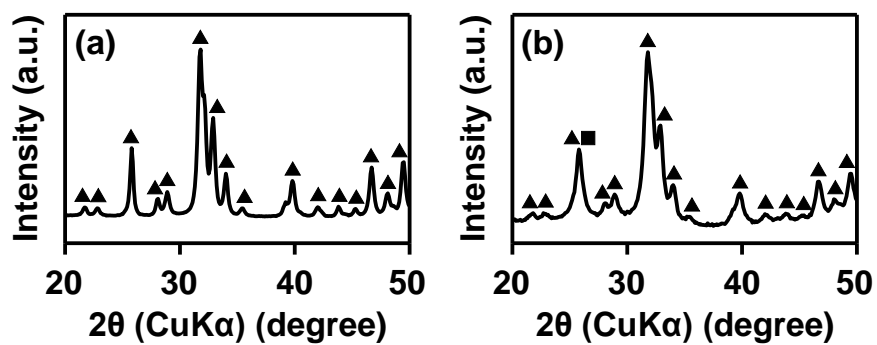

**Fig. S2** XRD analysis of (a) raw HAp and (b) CaP-1. ▲: HAp, ■: graphite.

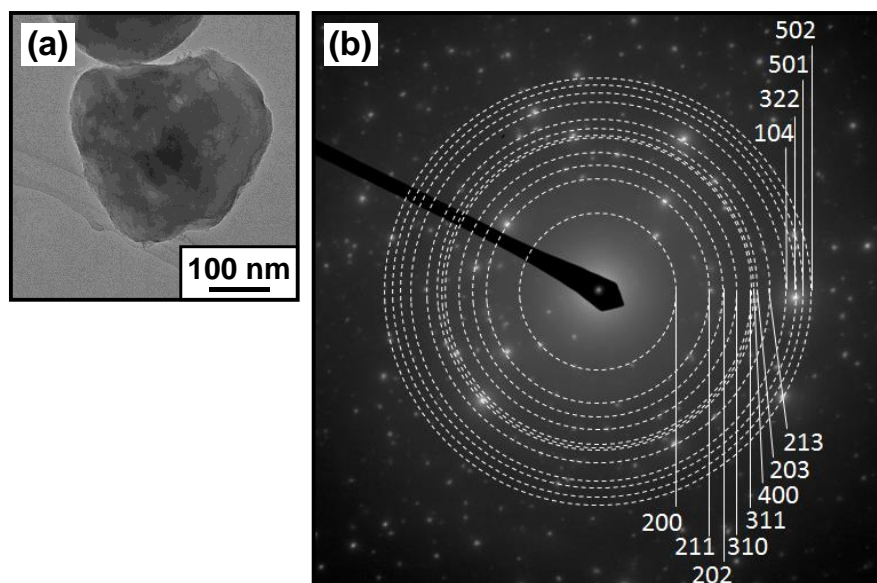

**Fig. S3** (a) TEM and (b) TED images of inadequately spheroidized agglomerates observed as a residual dross in **CaP-2**. Most of the discrete spots in TED were indexed as the planes of HAp.

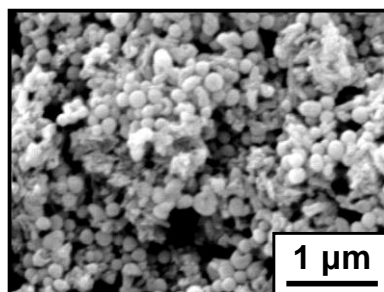

**Fig. S4** SEM image of **CaP-3**.

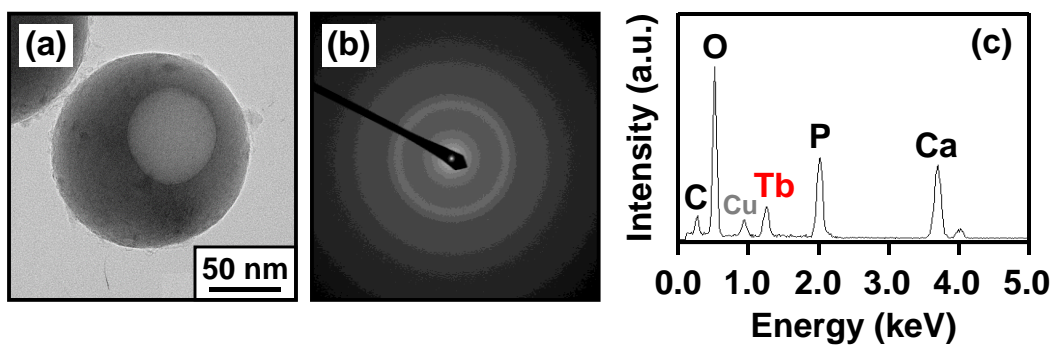

**Fig. S5** (a) TEM and (b) TED images and (c) TEM-EDX spectrum of a sphere in CaP-4. The peak of Cu was derived from a copper grid for TEM observation.

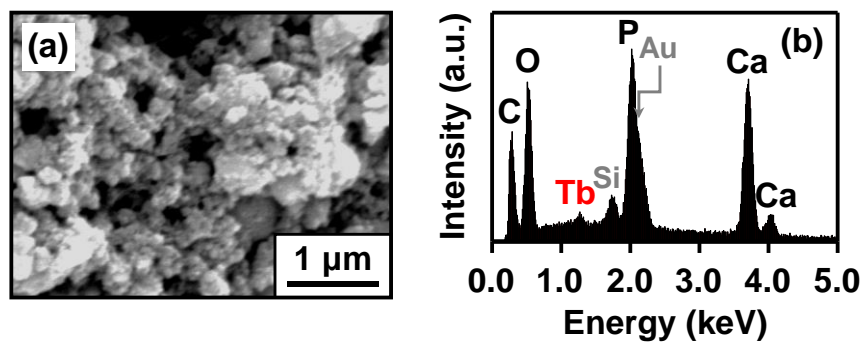

**Fig. S6** (a) SEM image and (b) SEM-EDX spectrum of CaP-5.

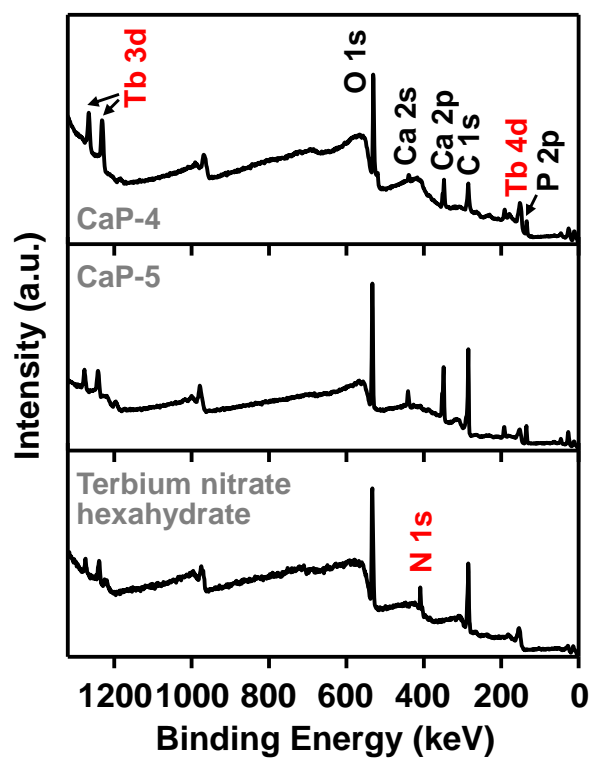

Fig. S7 XPS spectra of CaP-4, CaP-5, and terbium nitrate hexahydrate.
